# Supplementary material for: Stable Lewis acid chelate of a bis(imido) tungsten compound and implications for α-olefin dimerisation catalysis: a DFT study
Source: Royal Society of Chemistry journal article supplement (doi:10.1039/b716672a), 2008-01-01
Supplement: b716672a.pdf [file b716672a.pdf]

## SUPPLEMENTARY INFORMATION

### Stable Lewis acid chelate of a bis(imido) tungsten compound and implications for $\alpha$ -olefin dimerisation catalysis: a DFT study

Sven Tobisch<sup>a</sup>

<sup>a</sup> Sasol Technology (UK) Ltd, Purdie Building, North Haugh, St Andrews, KY15 9ST, U. K.

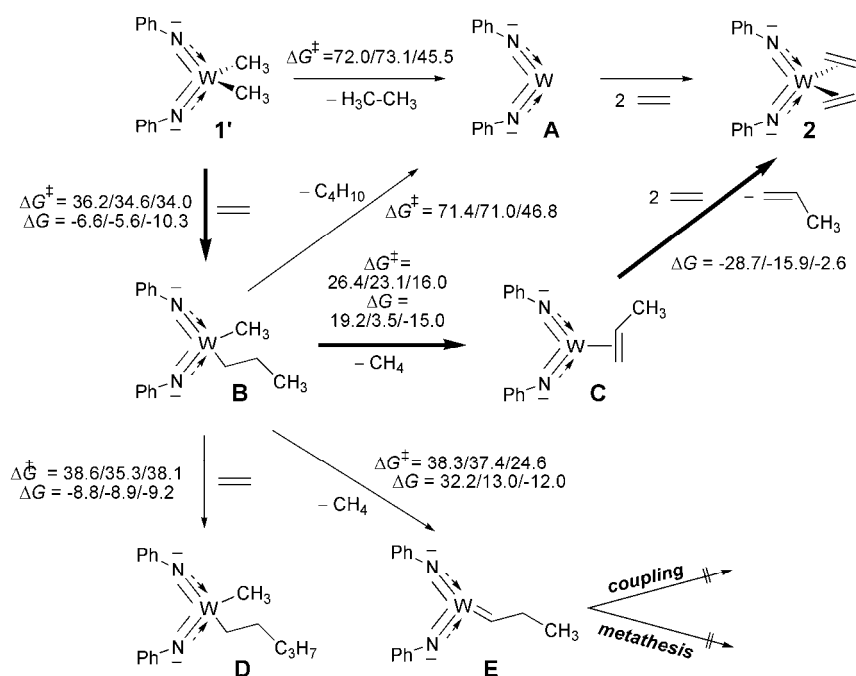

**Scheme S1** Condensed Gibbs free-energy profile (kcal mol<sup>-1</sup>) of alternative reaction routes for transformation of [W<sup>VI</sup>(NPh)<sub>2</sub>Me<sub>2</sub>] compound **1** into the [W<sup>IV</sup>(NPh)<sub>2</sub>(C<sub>2</sub>H<sub>4</sub>)<sub>2</sub>] active catalyst species **2**. The activation and reaction free energies for individual steps are given relative to the respective precursor for Lewis acid association modes **0**/I/II. The favorable route is indicated by bold reaction arrows.

## Computational Details

All DFT calculations were performed with the program package TURBOMOLE<sup>1</sup> using the TPSS density functional<sup>2</sup> within the RI-*J* approximation<sup>3</sup> in conjunction with flexible basis sets of triple- $\zeta$  quality. For W we used the Stuttgart–Dresden quasirelativistic effective core potential (SDD) with the associate (8s7p6d)/[6s5p3d] valence basis set contracted according to a (311111/22111/411) scheme.<sup>4</sup> All other elements were represented by Ahlrich's valence triple- $\zeta$  TZVP basis set<sup>5</sup> with polarization functions on all atoms. The good to excellent performance of the TPSS functional for a wide range of applications has been demonstrated previously.<sup>6</sup> In view of the fact that all species investigated in this study show a large HOMO–LUMO gap, a spin-restricted formalism was used for all the calculations.

All stationary points were located by utilizing analytical/numerical gradients/Hessians according to standard algorithms without imposing any symmetry constraints and were identified exactly by the curvature of the potential-energy surface at these points corresponding to the eigenvalues of the Hessian. The reaction and activation free energies ( $\Delta G$ ,  $\Delta G^\ddagger$  at 298 K and 1 atm) were evaluated according to standard textbook procedures<sup>7</sup> using computed harmonic frequencies. The influence of the solvent was taken into explicit consideration by making use of a continuum model. The experimentally used chlorobenzene solvent<sup>8</sup> was described as a homogeneous, isotropic dielectric medium (characterised by its relative static dielectric permittivity  $\epsilon = 5.621$  at 298 K)<sup>9</sup> within the conductor-like screening model (COSMO) due to Klamt and Schüürmann<sup>10</sup> as implemented in TURBOMOLE.<sup>11</sup> The optimised atomic COSMO radii ( $r_H = 1.3$  Å,  $r_C = 2.0$  Å,  $r_N = 1.83$  Å,  $r_{Cl} = 2.06$  Å)<sup>12</sup> have been used, in combination with the van der Waals radius<sup>13</sup> (multiplied by a standard scaling factor of 1.17) for aluminum; i.e.  $r_{Al} = 1.40$  Å, and the radius of 2.22 Å for W. Nonelectrostatic contributions to solvation were not included. The solvation effects were included self-consistently in the calculations, and all stationary points were fully optimised including solvation at the TPSS/SDD+Ahlrichs-TZVP level.

The electronic structure and bonding of localised stationary points was studied by means of natural population analysis (NPA)<sup>14</sup> and related Wiberg bond indices (WBIs)<sup>15</sup> by using the NBO 5.0<sup>16</sup> program in conjunction with the MAG-ReSpect<sup>17</sup> module.

In order to account for real condensed-phase reaction condition, the entropy costs for Lewis acid and olefin substrate association/dissociation processes was approximated as being two-thirds of its gas-phase value. This approximation was successfully applied in former investigations on group 4 metal-assisted selective olefin oligomerisation<sup>18</sup> and is expected to reasonably estimate the true entropy contribution in condensed phase.

The relative stability of various adducts of **3** with the AlClMe<sub>2</sub> Lewis acid (Fig. 1) is calculated with respect to  $\{\mathbf{3} + n/2 \times [\text{AlClMe}_2]_2\}$ , where  $n$  (1–3) is the number of associated AlClMe<sub>2</sub> moieties. The heat of 2 AlClMe<sub>2</sub>  $\rightleftharpoons$  [AlClMe<sub>2</sub>]<sub>2</sub> dimer formation amounts to  $-2.6$  kcal mol<sup>-1</sup> at the TPSS-COSMO/TZVP level of approximation. DFT methods, however, are known tending to under-bind dimers of aluminium compounds. The MP2 method has been

demonstrated being superior in this case and reproduces experimental values satisfactory.<sup>19</sup> This is illustrated here for  $[\text{AlMe}_3]_2 \rightleftharpoons 2 \text{AlMe}_3$ , for which the following experimental binding values are reported:<sup>20</sup>  $\Delta H = 20.4 \text{ kcal mol}^{-1}$  and  $\Delta S = 43.1 \text{ eu}$  for gas phase;  $\Delta H = 19.4 \text{ kcal mol}^{-1}$  and  $\Delta S = 29.3 \text{ eu}$  for liquid phase. DFT(TPSS-COSMO/TZVP) gives  $\Delta H = 10.5 \text{ kcal mol}^{-1}$ , whilst  $15.7 \text{ kcal mol}^{-1}$  (TZVP basis)<sup>5</sup> and  $17.2 \text{ kcal mol}^{-1}$  (TZVPP basis)<sup>21</sup>, respectively, result from SP-MP2(COSMO) calculations at DFT-optimised structures. Hence, to ensure a balanced description of Lewis acid association, the relative stabilities summarised in Fig. 1 are obtained by using the SP-MP2(COSMO) value of  $-7.9 \text{ kcal mol}^{-1}$  for the heat of  $\text{AlClMe}_2$  dimer formation.

- 
- 1 (a) R. Ahlrichs et al. TURBOMOLE V5.8: Quantum Chemistry Group, University of Karlsruhe, Germany, 1988; (b) R. Ahlrichs, M. Bär, M. Häser, H. Horn and C. Kölmel, *Chem. Phys. Lett.*, 1989, **162**, 165; (c) O. Treutler and R. Ahlrichs, *J. Chem. Phys.*, 1995, **102**, 346.
  - 2 (a) P. A. M. Dirac, *Proc. Royal Soc. (London)*, 1929, **A123**, 714; (b) J. C. Slater, *Phys. Rev.*, 1951, **81**, 385; (c) J. P. Perdew and Y. Wang, *Phys. Rev.*, 1992, **B45**, 13244; (d) J. Tao, J. P. Perdew, V. N. Staroverov and G. E. Scuseria, *Phys. Rev. Lett.*, 2003, **91**, 146401; (e) J. P. Perdew, J. Tao, V. N. Staroverov and G. E. Scuseria, *J. Chem. Phys.*, 2004, **120**, 6898.
  - 3 (a) O. Vahtras, J. Almlöf and M. W. Feyereisen, *Chem. Phys. Lett.*, 1993, **213**, 514; (b) K. Eichkorn, O. Treutler, H. Öhm, M. Häser and R. Ahlrichs, *Chem. Phys. Lett.*, 1995, **242**, 652.
  - 4 D. Andrae, U. Häußermann, M. Dolg, H. Stoll and H. Preuß, *Theor. Chim. Acta*, 1990, **77**, 123.
  - 5 (a) A. Schäfer, C. Huber and R. Ahlrichs, *J. Chem. Phys.*, 1994, **100**, 5829; (b) The TZVP basis sets are comparable to Pople's 6-311G\*\* basis sets.
  - 6 (a) V. N. Staroverov, G. E. Scuseria, J. Tao and J. P. Perdew, *J. Chem. Phys.*, 2003, **119**, 12129; (b) Y. Zao and D. G. Truhlar, *J. Chem. Theory Comput.*, 2005, **1**, 415; (c) F. Furche and J. P. Perdew, *J. Chem. Phys.*, 2006, **124**, 044103.
  - 7 D. A. McQuarrie, *Statistical Thermodynamics*, Harper & Row, New York, 1973.
  - 8 M. J. Hanton and R. P. Tooze, WO 2005/089940 (Sasol Technology (UK) Ltd), 29 September 2005.
  - 9 CRC Handbook of Chemistry and Physics, 84th ed. (Ed.: D. R. Lide), CRC Press, New York, 2003–2004.
  - 10 (a) A. Klamt and G. Schüürmann, *J. Chem. Soc. Perkin Trans. 2*, 1993, 799; (b) A. Klamt in *Encyclopedia of Computational Chemistry*, Vol. 1 (Ed.: P. von R. Schleyer), Wiley, Chichester, 1998, pp. 604–615.

- 11 A. Schäfer, A. Klamt, D. Sattel, J. C. W. Lohrenz and F. Eckert, *Phys. Chem. Chem. Phys.*, 2000, **2**, 2187.
  - 12 A. Klamt, V. Jonas, Th. Bürger and J. C. W. Lohrenz, *J. Phys. Chem. A*, 1998, **102**, 5074.
  - 13 A. Bondi, *J. Phys. Chem.*, 1964, **68**, 441.
  - 14 A. E. Reed, L. A. Curtiss and F. Weinhold, *Chem. Rev.*, 1988, **88**, 899.
  - 15 K. B. Wiberg, *Tetrahedron*, 1968, **24**, 1083.
  - 16 NBO 5.0, E. D. Glendening, J. K. Badenhoop, A. E. Reed, J. E. Carpenter, J. A. Bohmann, C. M. Morales and F. Weinhold (Theoretical Chemistry Institute, University of Wisconsin, Madison, MI, 2001)
  - 17 V. G. Malkin, O. L. Malkina, R. Reviakine, A. V. Arbuznikov, M. Kaupp, B. Schimmelpfennig, I. Malkin, M. Repiský, S. Komorovský, P. Hrobarik, E. Malkin, T. Helgaker, and K. Ruud, ReSpect program, version 1.2, 2005.
  - 18 (a) S. Tobisch and T. Ziegler, *Organometallics*, 2003, **22**, 5392; (b) S. Tobisch and T. Ziegler, *J. Am. Chem. Soc.*, 2004, **126**, 9059.
  - 19 B. A. Willis and K. F. Jensen, *J. Phys. Chem. A*, 1998, **102**, 2613.
  - 20 (a) C. H. Henrickson and D. P. Eyman, *Inorg. Chem.*, 1967, **6**, 1461. (b) M. B. Smith, *J. Organomet. Chem.*, 1972, **46**, 31.
  - 21 The TZVPP basis sets are comparable to Pople's 6-311G(2df) basis sets.
-

Optimised structures and total electronic energies (hartree) of all species reported.

| 2-0             |         |         | 2-I              |    |         | 2-II             |         |    |         |         |         |
|-----------------|---------|---------|------------------|----|---------|------------------|---------|----|---------|---------|---------|
| E = -797.576925 |         |         | E = -1580.262399 |    |         | E = -2362.912531 |         |    |         |         |         |
| W               | -0,9263 | -0,0062 | 0,0062           | W  | -0,8472 | -0,2027          | -0,0004 | W  | -0,0204 | -0,0000 | -0,0000 |
| C               | -1,7877 | -0,0105 | -2,0826          | C  | -1,7183 | -0,2924          | -2,0734 | C  | -0,9530 | -0,2442 | 2,0891  |
| C               | -2,9480 | -0,0061 | -1,2766          | C  | -2,8953 | -0,2500          | -1,2919 | C  | -2,0650 | -0,2373 | 1,2505  |
| C               | -2,9224 | -0,0552 | 1,3253           | C  | -2,8990 | -0,2470          | 1,2852  | C  | -2,0648 | 0,2373  | -1,2508 |
| C               | -1,7480 | -0,0268 | 2,1106           | C  | -1,7243 | -0,2891          | 2,0702  | C  | -0,9527 | 0,2441  | -2,0893 |
| H               | -1,4650 | 0,9075  | -2,5671          | H  | -1,3869 | 0,5946           | -2,6072 | H  | -0,5564 | -1,1838 | 2,4613  |
| H               | -1,4713 | -0,9320 | -2,5651          | H  | -1,4092 | -1,2423          | -2,5048 | H  | -0,6976 | 0,6370  | 2,6674  |
| H               | -3,5063 | 0,9134  | -1,1333          | H  | -3,4396 | 0,6830           | -1,1877 | H  | -2,5323 | -1,1747 | 0,9667  |
| H               | -3,5180 | -0,9191 | -1,1396          | H  | -3,4724 | -1,1525          | -1,1333 | H  | -2,6881 | 0,6451  | 1,1743  |
| H               | -3,5145 | 0,8454  | 1,2006           | H  | -3,4423 | 0,6862           | 1,1776  | H  | -2,6880 | -0,6451 | -1,1747 |
| H               | -3,4633 | -0,9865 | 1,1910           | H  | -3,4758 | -1,1494          | 1,1257  | H  | -2,5322 | 1,1748  | -0,9671 |
| H               | -1,4442 | 0,9000  | 2,5907           | H  | -1,3940 | 0,5985           | 2,6038  | H  | -0,6974 | -0,6371 | -2,6676 |
| H               | -1,3961 | -0,9389 | 2,5862           | H  | -1,4175 | -1,2384          | 2,5043  | H  | -0,5562 | 1,1837  | -2,4616 |
| N               | 0,0139  | -1,5480 | -0,0197          | N  | 0,8925  | -1,0639          | 0,0014  | N  | -0,0762 | -1,9368 | -0,1271 |
| C               | 0,9849  | -2,5257 | -0,0572          | C  | 2,1754  | -0,4469          | -0,0034 | N  | -0,0762 | 1,9368  | 0,1269  |
| N               | -0,0152 | 1,5542  | 0,0201           | Al | 0,8681  | -3,0029          | 0,0042  | C  | -0,8011 | -3,0738 | 0,2854  |
| C               | 0,9428  | 2,5446  | 0,0438           | Cl | -1,4531 | -2,8913          | 0,0017  | C  | -0,8009 | 3,0738  | -0,2855 |
| C               | 0,6872  | 3,7949  | -0,5614          | C  | 1,4734  | -3,7878          | -1,7154 | Al | 1,4137  | -2,4870 | -1,3224 |
| C               | 2,8845  | 4,5885  | 0,0893           | C  | 1,4690  | -3,7863          | 1,7262  | Cl | 2,0061  | -0,2443 | -1,6338 |
| C               | 2,1893  | 2,3405  | 0,6764           | N  | -0,5113 | 1,5317           | 0,0006  | C  | 2,8655  | -3,3712 | -0,3104 |
| C               | 3,1428  | 3,3558  | 0,6998           | C  | -0,2932 | 2,8937           | 0,0035  | C  | 0,7804  | -3,2104 | -3,0552 |
| H               | 4,0959  | 3,1836  | 1,1942           | H  | 2,5647  | -3,7084          | -1,8243 | Al | 1,4132  | 2,4869  | 1,3229  |
| H               | 2,3878  | 1,3804  | 1,1448           | H  | 1,0216  | -3,2975          | -2,5881 | Cl | 2,0058  | 0,2442  | 1,6338  |
| C               | 1,6540  | 4,7988  | -0,5419          | H  | 1,2223  | -4,8565          | -1,7723 | C  | 2,8652  | 3,3715  | 0,3116  |
| H               | -0,2723 | 3,9574  | -1,0446          | H  | 1,2138  | -4,8540          | 1,7839  | C  | 0,7794  | 3,2098  | 3,0557  |
| H               | 3,6333  | 5,3758  | 0,1063           | H  | 1,0178  | -3,2935          | 2,5978  | H  | -0,0424 | 2,6445  | 3,5123  |
| H               | 1,4433  | 5,7536  | -1,0174          | H  | 2,5604  | -3,7111          | 1,8364  | H  | 0,4377  | 4,2478  | 2,9401  |
| C               | 2,2963  | -2,2382 | -0,4968          | C  | 2,8152  | -0,1378          | -1,2172 | H  | 1,6080  | 3,2217  | 3,7780  |
| C               | 2,9504  | -4,5448 | -0,1338          | C  | 4,7343  | 0,7344           | -0,0142 | H  | 2,5873  | 4,3953  | 0,0260  |
| C               | 0,6776  | -3,8455 | 0,3404           | C  | 2,8405  | -0,1706          | 1,2046  | H  | 3,1305  | 2,8292  | -0,6043 |
| C               | 1,6551  | -4,8387 | 0,3051           | C  | 4,1057  | 0,4193           | 1,1941  | H  | 3,7712  | 3,4414  | 0,9297  |
| H               | 1,4036  | -5,8491 | 0,6183           | H  | 4,6010  | 0,6331           | 2,1382  | H  | 2,5875  | -4,3948 | -0,0245 |
| H               | -0,3312 | -4,0705 | 0,6751           | H  | 2,3526  | -0,4130          | 2,1444  | H  | 3,1307  | -2,8286 | 0,6053  |
| C               | 3,2623  | -3,2409 | -0,5362          | C  | 4,0809  | 0,4509           | -1,2174 | H  | 3,7716  | -3,4414 | -0,9285 |
| H               | 2,5343  | -1,2240 | -0,8054          | H  | 2,3078  | -0,3560          | -2,1527 | H  | -0,0400 | -2,6440 | -3,5129 |
| H               | 3,7084  | -5,3228 | -0,1634          | H  | 5,7191  | 1,1934           | -0,0183 | H  | 0,4370  | -4,2476 | -2,9390 |
| H               | 4,2663  | -3,0041 | -0,8802          | H  | 4,5570  | 0,6892           | -2,1655 | H  | 1,6096  | -3,2242 | -3,7768 |
|                 |         |         |                  | C  | 1,0239  | 3,3967           | 0,0258  | C  | -0,4358 | 3,7573  | -1,4625 |
|                 |         |         |                  | C  | 0,1548  | 5,6591           | 0,0105  | C  | -2,2530 | 5,3308  | -1,1384 |
|                 |         |         |                  | C  | -1,3831 | 3,7876           | -0,0151 | C  | -1,8908 | 3,5519  | 0,4692  |
|                 |         |         |                  | C  | -1,1522 | 5,1614           | -0,0117 | C  | -2,6121 | 4,6640  | 0,0362  |
|                 |         |         |                  | H  | -1,9958 | 5,8461           | -0,0261 | H  | -3,4546 | 5,0151  | 0,6268  |
|                 |         |         |                  | H  | -2,3945 | 3,3931           | -0,0320 | H  | -2,1619 | 3,0490  | 1,3931  |
|                 |         |         |                  | C  | 1,2374  | 4,7728           | 0,0292  | C  | -1,1604 | 4,8736  | -1,8800 |
|                 |         |         |                  | H  | 1,8560  | 2,6998           | 0,0397  | H  | 0,4190  | 3,4087  | -2,0353 |
|                 |         |         |                  | H  | 0,3291  | 6,7315           | 0,0132  | H  | -2,8150 | 6,1997  | -1,4692 |
|                 |         |         |                  | H  | 2,2540  | 5,1562           | 0,0466  | H  | -0,8656 | 5,3887  | -2,7908 |
|                 |         |         |                  |    |         |                  |         | C  | -1,8910 | -3,5517 | -0,4694 |
|                 |         |         |                  |    |         |                  |         | C  | -2,2535 | -5,3305 | 1,1381  |
|                 |         |         |                  |    |         |                  |         | C  | -0,4362 | -3,7572 | 1,4624  |
|                 |         |         |                  |    |         |                  |         | C  | -1,1609 | -4,8734 | 1,8799  |
|                 |         |         |                  |    |         |                  |         | H  | -0,8664 | -5,3884 | 2,7909  |
|                 |         |         |                  |    |         |                  |         | H  | 0,4186  | -3,4087 | 2,0352  |
|                 |         |         |                  |    |         |                  |         | C  | -2,6125 | -4,6638 | -0,0364 |
|                 |         |         |                  |    |         |                  |         | H  | -2,1620 | -3,0488 | -1,3934 |
|                 |         |         |                  |    |         |                  |         | H  | -2,8152 | -6,1998 | 1,4686  |
|                 |         |         |                  |    |         |                  |         | H  | -3,4550 | -5,0147 | -0,6270 |

| TS <sub>OXC-0</sub> |         |         | TS <sub>OXC-I</sub> |    |         | TS <sub>OXC-II</sub> |         |    |         |         |         |
|---------------------|---------|---------|---------------------|----|---------|----------------------|---------|----|---------|---------|---------|
| E = -797.566528     |         |         | E = -1580.253416    |    |         | E = -2362.892430     |         |    |         |         |         |
| W                   | -0,9643 | 0,0580  | 0,0017              | W  | -0,8029 | -0,2703              | -0,0004 | W  | -0,6919 | -0,4721 | -0,1539 |
| C                   | -2,1002 | 0,1557  | -1,8381             | C  | -1,9052 | -0,3905              | -1,8499 | C  | -1,9822 | -0,6821 | 1,5474  |
| C                   | -3,2392 | 0,4421  | -0,9458             | C  | -3,1174 | -0,3136              | -0,9950 | C  | -3,1001 | -0,5672 | 0,5881  |
| C                   | -3,2472 | 0,0021  | 1,0062              | C  | -3,1277 | -0,4780              | 0,9624  | C  | -2,8933 | -0,4780 | -1,4013 |
| C                   | -2,0554 | 0,1037  | 1,8692              | C  | -1,9266 | -0,4189              | 1,8333  | C  | -1,6040 | -0,4680 | -2,1136 |
| H                   | -1,7676 | 0,9808  | -2,4672             | H  | -1,7237 | 0,4695               | -2,4927 | H  | -1,8770 | -1,6497 | 2,0340  |
| H                   | -2,1451 | -0,7930 | -2,3721             | H  | -1,7639 | -1,3401              | -2,3641 | H  | -1,8458 | 0,1535  | 2,2354  |
| H                   | -3,5010 | 1,4947  | -0,8680             | H  | -3,6275 | 0,6439               | -1,0442 | H  | -3,7311 | -1,4454 | 0,5219  |
| H                   | -4,1137 | -0,1910 | -1,0582             | H  | -3,7992 | -1,1503              | -1,1013 | H  | -3,6611 | 0,3595  | 0,6545  |
| H                   | -4,0096 | 0,7625  | 1,1431              | H  | -3,8180 | 0,3506               | 1,0873  | H  | -3,4872 | -1,3721 | -1,5467 |
| H                   | -3,6704 | -0,9969 | 0,9333              | H  | -3,6260 | -1,4410              | 0,9735  | H  | -3,4685 | 0,4384  | -1,4889 |
| H                   | -1,9429 | 1,0421  | 2,4120              | H  | -1,8322 | 0,4673               | 2,4586  | H  | -1,3614 | -1,3668 | -2,6773 |
| H                   | -1,8348 | -0,7696 | 2,4821              | H  | -1,7076 | -1,3409              | 2,3709  | H  | -1,3563 | 0,4423  | -2,6560 |
| N                   | -0,0854 | -1,5120 | 0,0001              | N  | 0,9922  | -0,9533              | 0,0033  | N  | -0,5181 | 1,3121  | 0,1712  |
| C                   | 0,8974  | -2,4814 | 0,0197              | C  | 2,2395  | -0,2675              | -0,0001 | N  | 0,9775  | -1,3329 | 0,1862  |
| N                   | 0,0953  | 1,5099  | -0,0159             | Al | 1,0818  | -2,8997              | -0,0035 | C  | -0,8875 | 2,4050  | 0,9862  |
| C                   | 1,1953  | 2,3452  | -0,0489             | Cl | -1,2474 | -2,9695              | -0,0174 | C  | 2,2190  | -0,8816 | 0,7195  |
| C                   | 1,0399  | 3,7244  | 0,2068              | C  | 1,7370  | -3,6313              | -1,7267 | Al | 0,7377  | 2,3139  | -1,4246 |
| C                   | 3,4176  | 4,0767  | -0,1191             | C  | 1,7165  | -3,6452              | 1,7215  | Cl | 1,5243  | 0,6782  | -2,6906 |
| C                   | 2,4841  | 1,8496  | -0,3437             | N  | -0,5814 | 1,4814               | 0,0071  | C  | -0,6069 | 3,3755  | -2,4188 |
| C                   | 3,5791  | 2,7103  | -0,3767             | C  | -0,4275 | 2,8518               | 0,0153  | C  | 2,1912  | 3,1200  | -0,3544 |
| H                   | 4,5650  | 2,3128  | -0,6048             | H  | 2,8153  | -3,4555              | -1,8492 | Al | 0,9316  | -3,2781 | -0,0927 |
| H                   | 2,6053  | 0,7886  | -0,5441             | H  | 1,2315  | -3,1820              | -2,5918 | Cl | -1,3671 | -3,0986 | -0,4098 |
| C                   | 2,1438  | 4,5759  | 0,1720              | H  | 1,5801  | -4,7180              | -1,7803 | C  | 1,2501  | -4,2335 | 1,6127  |
| H                   | 0,0489  | 4,1086  | 0,4319              | H  | 1,5554  | -4,7316              | 1,7658  | C  | 1,7357  | -3,8748 | -1,8015 |
| H                   | 4,2748  | 4,7438  | -0,1456             | H  | 1,2035  | -3,2003              | 2,5846  | H  | -0,9096 | 4,2787  | -1,8743 |
| H                   | 2,0081  | 5,6359  | 0,3723              | H  | 2,7941  | -3,4740              | 1,8565  | H  | -1,5179 | 2,8258  | -2,6867 |
| C                   | 1,9936  | -2,3889 | 0,9043              | C  | 0,8620  | 3,4194               | -0,0426 | H  | -0,1426 | 3,7011  | -3,3613 |
| C                   | 2,8779  | -4,4860 | 0,0660              | C  | -0,1159 | 5,6366               | 0,0316  | H  | 2,6887  | 2,3938  | 0,2996  |
| C                   | 0,8087  | -3,5995 | -0,8370             | C  | -1,5586 | 3,6907               | 0,0821  | H  | 1,8547  | 3,9621  | 0,2624  |
| C                   | 1,7944  | -4,5847 | -0,8131             | C  | -1,3952 | 5,0743               | 0,0894  | H  | 2,9503  | 3,5015  | -1,0524 |
| H                   | 1,7140  | -5,4373 | -1,4832             | H  | -2,2707 | 5,7157               | 0,1406  | H  | 2,8291  | -3,9551 | -1,7292 |
| H                   | -0,0349 | -3,6755 | -1,5175             | H  | -2,5487 | 3,2474               | 0,1276  | H  | 1,5082  | -3,1889 | -2,6274 |
| C                   | 2,9690  | -3,3837 | 0,9230              | C  | 1,0069  | 4,8044               | -0,0337 | H  | 1,3585  | -4,8687 | -2,0799 |
| H                   | 2,0620  | -1,5312 | 1,5680              | H  | 1,7266  | 2,7657               | -0,0932 | H  | 0,6762  | -3,8063 | 2,4451  |
| H                   | 3,6423  | -5,2580 | 0,0829              | H  | 0,0056  | 6,7161               | 0,0378  | H  | 2,3116  | -4,2037 | 1,8959  |
| H                   | 3,8065  | -3,2979 | 1,6112              | H  | 2,0027  | 5,2376               | -0,0784 | H  | 0,9690  | -5,2921 | 1,5240  |
|                     |         |         |                     | C  | 2,8562  | 0,0838               | -1,2135 | C  | -2,0332 | 3,1565  | 0,6708  |
|                     |         |         |                     | C  | 4,7141  | 1,0742               | -0,0078 | C  | -1,6925 | 4,4965  | 2,6596  |
|                     |         |         |                     | C  | 2,8851  | 0,0441               | 1,2088  | C  | -0,1386 | 2,7126  | 2,1353  |
|                     |         |         |                     | C  | 4,1095  | 0,7149               | 1,2003  | C  | -0,5489 | 3,7530  | 2,9662  |
|                     |         |         |                     | H  | 4,5919  | 0,9564               | 2,1442  | H  | 0,0301  | 3,9840  | 3,8560  |
|                     |         |         |                     | H  | 2,4137  | -0,2335              | 2,1474  | H  | 0,7507  | 2,1349  | 2,3620  |
|                     |         |         |                     | C  | 4,0806  | 0,7546               | -1,2124 | C  | -2,4321 | 4,1925  | 1,5135  |
|                     |         |         |                     | H  | 2,3625  | -0,1641              | -2,1489 | H  | -2,6019 | 2,9200  | -0,2223 |
|                     |         |         |                     | H  | 5,6672  | 1,5960               | -0,0107 | H  | -2,0063 | 5,3070  | 3,3113  |
|                     |         |         |                     | H  | 4,5406  | 1,0266               | -2,1593 | H  | -3,3233 | 4,7645  | 1,2703  |
|                     |         |         |                     |    |         |                      |         | C  | 3,3984  | -0,9860 | -0,0375 |
|                     |         |         |                     |    |         |                      |         | C  | 4,6834  | -0,0836 | 1,8124  |
|                     |         |         |                     |    |         |                      |         | C  | 2,2888  | -0,3866 | 2,0331  |
|                     |         |         |                     |    |         |                      |         | C  | 3,5131  | 0,0090  | 2,5718  |
|                     |         |         |                     |    |         |                      |         | H  | 3,5518  | 0,3861  | 3,5907  |
|                     |         |         |                     |    |         |                      |         | H  | 1,3814  | -0,3385 | 2,6288  |
|                     |         |         |                     |    |         |                      |         | C  | 4,6178  | -0,5816 | 0,5084  |
|                     |         |         |                     |    |         |                      |         | H  | 3,3472  | -1,3547 | -1,0566 |
|                     |         |         |                     |    |         |                      |         | H  | 5,6360  | 0,2259  | 2,2335  |
|                     |         |         |                     |    |         |                      |         | H  | 5,5202  | -0,6558 | -0,0928 |

| 3-0             |         |         | 3-I              |    |         | 3-II             |         |    |         |         |         |
|-----------------|---------|---------|------------------|----|---------|------------------|---------|----|---------|---------|---------|
| E = -797.582169 |         |         | E = -1580.263881 |    |         | E = -2362.914368 |         |    |         |         |         |
| W               | -0,9485 | -0,0092 | 0,0059           | W  | -0,7885 | -0,3420          | 0,0005  | W  | -0,1171 | -0,3481 | -0,6586 |
| C               | -2,3681 | -0,0822 | -1,5923          | C  | -2,1268 | -0,5577          | -1,6522 | C  | -2,2811 | -0,4215 | -0,6759 |
| C               | -3,5479 | -0,4526 | -0,6355          | C  | -3,3676 | -0,7789          | -0,7234 | C  | -2,8801 | 0,0499  | -2,0030 |
| C               | -3,5436 | 0,3671  | 0,7049           | C  | -3,3547 | -0,0799          | 0,7034  | C  | -2,0962 | -0,6768 | -3,1003 |
| C               | -2,3330 | 0,0282  | 1,6344           | C  | -2,1600 | -0,4504          | 1,6375  | C  | -0,6072 | -0,4263 | -2,8321 |
| H               | -2,5375 | 0,8984  | -2,0510          | H  | -2,2295 | 0,3429           | -2,2622 | H  | -2,5400 | -1,4745 | -0,5000 |
| H               | -2,2253 | -0,8274 | -2,3780          | H  | -1,9546 | -1,4228          | -2,2955 | H  | -2,6342 | 0,1469  | 0,1981  |
| H               | -4,5020 | -0,2783 | -1,1480          | H  | -4,2616 | -0,4060          | -1,2357 | H  | -3,9578 | -0,1614 | -2,0545 |
| H               | -3,5108 | -1,5232 | -0,3930          | H  | -3,5003 | -1,8521          | -0,5633 | H  | -2,7555 | 1,1355  | -2,1142 |
| H               | -3,5401 | 1,4382  | 0,4620           | H  | -3,3880 | 1,0065           | 0,5687  | H  | -2,3035 | -1,7529 | -3,0383 |
| H               | -4,4808 | 0,1679  | 1,2390           | H  | -4,2937 | -0,3735          | 1,1869  | H  | -2,3882 | -0,3460 | -4,1073 |
| H               | -2,1916 | 0,7773  | 2,4166           | H  | -2,0410 | 0,2712           | 2,4478  | H  | 0,0484  | -1,1052 | -3,3833 |
| H               | -2,4658 | -0,9564 | 2,0967           | H  | -2,2661 | -1,4583          | 2,0480  | H  | -0,3435 | 0,5999  | -3,1348 |
| N               | 0,0350  | -1,5115 | 0,0197           | N  | 1,0453  | -0,9160          | 0,0141  | N  | -0,0642 | 1,4549  | -0,3036 |
| C               | 1,1240  | -2,3619 | 0,0276           | C  | 2,2284  | -0,1276          | 0,0448  | N  | -0,0067 | -1,3931 | 0,9637  |
| N               | 0,0018  | 1,5143  | -0,0246          | Al | 1,2683  | -2,8510          | 0,0243  | C  | -0,5244 | 2,6335  | 0,3184  |
| C               | 1,0726  | 2,3870  | -0,0473          | Cl | -1,0471 | -3,0600          | 0,0202  | C  | 0,1434  | -0,8163 | 2,2604  |
| C               | 1,6324  | 2,8040  | -1,2739          | C  | 1,9503  | -3,6010          | -1,6820 | Al | 1,7633  | 2,0382  | -1,2326 |
| C               | 3,2285  | 4,1981  | -0,0941          | C  | 1,9656  | -3,5110          | 1,7595  | Cl | 2,2646  | -0,1924 | -1,6746 |
| C               | 1,6060  | 2,8982  | 1,1550           | N  | -0,6107 | 1,4140           | -0,0229 | C  | 1,4280  | 3,0058  | -2,9157 |
| C               | 2,6746  | 3,7924  | 1,1248           | C  | -0,4756 | 2,7832           | -0,0604 | C  | 2,9504  | 2,6518  | 0,2138  |
| H               | 3,0772  | 4,1753  | 2,0593           | H  | 3,0352  | -3,4559          | -1,7834 | Al | -0,0721 | -3,3446 | 0,8588  |
| H               | 1,1732  | 2,5812  | 2,0996           | H  | 1,4731  | -3,1500          | -2,5623 | Cl | 0,0068  | -3,0507 | -1,4129 |
| C               | 2,7016  | 3,6977  | -1,2896          | H  | 1,7669  | -4,6842          | -1,7275 | C  | -1,8240 | -4,1029 | -1,4012 |
| H               | 1,2197  | 2,4142  | -2,2001          | H  | 1,9122  | -4,6070          | 1,8203  | C  | 1,6247  | -4,1217 | 1,5261  |
| H               | 4,0614  | 4,8955  | -0,1121          | H  | 1,4086  | -3,1041          | 2,6139  | H  | 1,2255  | 4,0670  | -2,7205 |
| H               | 3,1254  | 4,0067  | -2,2420          | H  | 3,0206  | -3,2321          | 1,8939  | H  | 0,5967  | 2,6078  | -3,5086 |
| C               | 1,5101  | -3,0379 | -1,1493          | C  | 3,0890  | -0,0942          | -1,0668 | H  | 2,3301  | 2,9545  | -3,5400 |
| C               | 3,3157  | -4,1300 | 0,0463           | C  | 4,5840  | 1,4115           | 0,1076  | H  | 2,9275  | 1,9976  | 1,0924  |
| C               | 1,8500  | -2,5914 | 1,2159           | C  | 2,5699  | 0,6091           | 1,1925  | H  | 2,6819  | 3,6648  | 0,5399  |
| C               | 2,9355  | -3,4653 | 1,2174           | C  | 3,7352  | 1,3751           | 1,2181  | H  | 3,9850  | 2,6849  | -0,1528 |
| H               | 3,4875  | -3,6297 | 2,1395           | H  | 3,9828  | 1,9426           | 2,1118  | H  | 1,6714  | -4,0945 | 2,6239  |
| H               | 1,5509  | -2,0749 | 2,1235           | H  | 1,9152  | 0,5703           | 2,0589  | H  | 2,5082  | -3,5935 | 1,1446  |
| C               | 2,5970  | -3,9102 | -1,1335          | C  | 4,2549  | 0,6726           | -1,0320 | H  | 1,7158  | -5,1751 | 1,2251  |
| H               | 0,9498  | -2,8647 | -2,0638          | H  | 2,8284  | -0,6600          | -1,9566 | H  | -2,6826 | -3,5653 | 0,9781  |
| H               | 4,1620  | -4,8113 | 0,0536           | H  | 5,4929  | 2,0066           | 0,1314  | H  | -1,9380 | -4,0990 | 2,4945  |
| H               | 2,8843  | -4,4222 | -2,0486          | H  | 4,9057  | 0,6940           | -1,9026 | H  | -1,9022 | -5,1496 | 1,0747  |
|                 |         |         |                  | C  | -0,5605 | 3,5378           | 1,1277  | C  | -1,1276 | 3,6364  | -0,4645 |
|                 |         |         |                  | C  | -0,2237 | 5,5712           | -0,1462 | C  | -1,5015 | 4,9594  | 1,5288  |
|                 |         |         |                  | C  | -0,2608 | 3,4364           | -1,2916 | C  | -0,4007 | 2,8075  | 1,7091  |
|                 |         |         |                  | C  | -0,1365 | 4,8229           | -1,3253 | C  | -0,8948 | 3,9656  | 2,3042  |
|                 |         |         |                  | H  | 0,0310  | 5,3222           | -2,2758 | H  | -0,8033 | 4,0945  | 3,3792  |
|                 |         |         |                  | H  | -0,1900 | 2,8463           | -2,2002 | H  | 0,0718  | 2,0334  | 2,3044  |
|                 |         |         |                  | C  | -0,4353 | 4,9238           | 1,0759  | C  | -1,6196 | 4,7887  | 0,1466  |
|                 |         |         |                  | H  | -0,7205 | 3,0266           | 2,0720  | H  | -1,2245 | 3,4937  | -1,5360 |
|                 |         |         |                  | H  | -0,1252 | 6,6525           | -0,1794 | H  | -1,8824 | 5,8609  | 2,0004  |
|                 |         |         |                  | H  | -0,5014 | 5,5019           | 1,9937  | H  | -2,0947 | 5,5543  | -0,4603 |
|                 |         |         |                  |    |         |                  |         | C  | 1,4070  | -0,3986 | 2,7124  |
|                 |         |         |                  |    |         |                  |         | C  | 0,4521  | 0,2213  | 4,8541  |
|                 |         |         |                  |    |         |                  |         | C  | -0,9624 | -0,7253 | 3,1247  |
|                 |         |         |                  |    |         |                  |         | C  | -0,8039 | -0,2000 | 4,4079  |
|                 |         |         |                  |    |         |                  |         | H  | -1,6689 | -0,1239 | 5,0617  |
|                 |         |         |                  |    |         |                  |         | H  | -1,9384 | -1,0561 | 2,7818  |
|                 |         |         |                  |    |         |                  |         | C  | 1,5552  | 0,1141  | 4,0021  |
|                 |         |         |                  |    |         |                  |         | H  | 2,2643  | -0,4918 | 2,0520  |
|                 |         |         |                  |    |         |                  |         | H  | 0,5706  | 0,6244  | 5,8560  |
|                 |         |         |                  |    |         |                  |         | H  | 2,5385  | 0,4311  | 4,3396  |

| TS <sub>βHab-0</sub><br>E = -797.519106 |         |         | TS <sub>βHab-I</sub><br>E = -1580.205253 |    |         | TS <sub>βHab-II</sub><br>E = -2362.872919 |         |    |         |         |         |
|-----------------------------------------|---------|---------|------------------------------------------|----|---------|-------------------------------------------|---------|----|---------|---------|---------|
| W                                       | -0,5701 | -0,6487 | 0,1716                                   | W  | -0,0730 | 0,1127                                    | 0,4298  | W  | -0,1184 | -0,0093 | 0,2133  |
| C                                       | -1,9692 | -2,4654 | 0,6435                                   | C  | -1,4000 | -1,8861                                   | 0,3078  | C  | -1,5194 | -1,5140 | 1,3873  |
| C                                       | -2,4670 | -1,3123 | 1,3535                                   | C  | -2,1731 | -0,9461                                   | 1,0419  | C  | -2,0267 | -0,2294 | 1,6275  |
| C                                       | -3,1338 | -0,3332 | 0,3461                                   | C  | -2,8264 | 0,1320                                    | 0,1681  | C  | -2,7695 | 0,3981  | 0,4434  |
| C                                       | -2,3728 | -0,3874 | -1,0259                                  | C  | -1,7548 | 0,5093                                    | -0,9025 | C  | -2,0465 | -0,0552 | -0,8532 |
| H                                       | -2,4916 | -2,7595 | -0,2598                                  | H  | -1,5712 | -1,9725                                   | -0,7595 | H  | -1,9090 | -2,0988 | 0,5645  |
| H                                       | -1,5298 | -3,2788 | 1,2185                                   | H  | -1,0218 | -2,7693                                   | 0,8103  | H  | -1,0300 | -2,0617 | 2,1857  |
| H                                       | -1,3332 | -0,6640 | 1,8464                                   | H  | -1,2002 | -0,1137                                   | 1,8387  | H  | -0,5512 | 0,5611  | 1,7907  |
| H                                       | -2,8637 | -1,3374 | 2,3712                                   | H  | -2,6171 | -1,1988                                   | 2,0045  | H  | -2,1611 | 0,1768  | 2,6276  |
| H                                       | -4,1580 | -0,7089 | 0,2105                                   | H  | -3,7429 | -0,2768                                   | -0,2789 | H  | -3,8083 | 0,0335  | 0,4911  |
| H                                       | -3,1934 | 0,6808  | 0,7455                                   | H  | -3,1025 | 1,0005                                    | 0,7710  | H  | -2,7953 | 1,4851  | 0,5401  |
| H                                       | -2,7043 | -1,2153 | -1,6527                                  | H  | -1,8087 | -0,1580                                   | -1,7670 | H  | -2,3899 | -1,0223 | -1,2190 |
| H                                       | -2,4448 | 0,5542  | -1,5690                                  | H  | -1,8480 | 1,5425                                    | -1,2389 | H  | -2,1123 | 0,6871  | -1,6507 |
| N                                       | -0,2636 | 1,1428  | 0,2103                                   | N  | 1,5440  | -0,5344                                   | -0,4609 | N  | 1,4121  | -0,9925 | 0,8919  |
| C                                       | -0,2935 | 2,5091  | 0,3207                                   | C  | 2,2049  | 0,2780                                    | -1,4141 | N  | -0,0385 | 1,9327  | 0,2570  |
| N                                       | 0,9091  | -1,5506 | -0,3695                                  | Al | 2,3608  | -2,0468                                   | 0,4512  | C  | 2,3564  | -0,4081 | 1,7783  |
| C                                       | 2,2221  | -1,7037 | -0,7471                                  | Cl | 1,0669  | -1,4638                                   | 2,3207  | C  | -0,4709 | 2,8985  | 1,1998  |
| C                                       | 2,5871  | -1,6575 | -2,1130                                  | C  | 1,8086  | -3,8021                                   | -0,2880 | Al | 1,7953  | -2,7899 | 0,1900  |
| C                                       | 4,9100  | -2,0459 | -1,5326                                  | C  | 4,2507  | -1,8462                                   | 1,0349  | Cl | 0,0129  | -2,5806 | -1,2172 |
| C                                       | 3,2316  | -1,9363 | 0,2158                                   | N  | 0,1103  | 1,8776                                    | 0,6911  | C  | 3,4605  | -2,8642 | -0,8884 |
| C                                       | 4,5581  | -2,0953 | -0,1786                                  | H  | 2,4019  | -4,0339                                   | -1,1855 | C  | 1,4722  | -4,1501 | 1,6000  |
| H                                       | 5,3230  | -2,2653 | 0,5753                                   | H  | 0,7518  | -3,8504                                   | -0,5769 | Al | 0,8519  | 2,6725  | -1,3212 |
| H                                       | 2,9551  | -1,9816 | 1,2656                                   | H  | 1,9943  | -4,6114                                   | 0,4322  | Cl | 1,1214  | 0,4676  | -2,0133 |
| C                                       | 3,9163  | -1,8273 | -2,4937                                  | H  | 4,4563  | -0,9024                                   | 1,5560  | C  | -0,3486 | 3,5469  | -2,6372 |
| H                                       | 1,8129  | -1,4848 | -2,8555                                  | H  | 4,9587  | -1,9297                                   | 0,1986  | C  | 2,6154  | 3,4548  | -0,8774 |
| H                                       | 5,9455  | -2,1758 | -1,8346                                  | H  | 4,4882  | -2,6611                                   | 1,7351  | H  | 3,1949  | 2,8189  | -0,1964 |
| H                                       | 4,1793  | -1,7876 | -3,5480                                  | C  | -0,0330 | 3,2326                                    | 0,8867  | H  | 2,5040  | 4,4370  | -0,3960 |
| C                                       | -0,3714 | 3,1362  | 1,5862                                   | C  | 3,5427  | 0,6892                                    | -1,2392 | H  | 3,2172  | 3,6077  | -1,7842 |
| C                                       | -0,3388 | 5,3236  | 0,5338                                   | C  | 3,4724  | 1,9018                                    | -3,3406 | H  | -0,5220 | 4,6053  | -2,3986 |
| C                                       | -0,2313 | 3,3218  | -0,8355                                  | C  | 1,5216  | 0,6861                                    | -2,5779 | H  | -1,3286 | 3,0593  | -2,7220 |
| C                                       | -0,2636 | 4,7102  | -0,7216                                  | C  | 2,1512  | 1,4889                                    | -3,5295 | H  | 0,1161  | 3,5163  | -3,6335 |
| H                                       | -0,2192 | 5,3186  | -1,6217                                  | H  | 1,6074  | 1,7878                                    | -4,4222 | H  | 4,3646  | -2,8788 | -0,2648 |
| H                                       | -0,1599 | 2,8454  | -1,8092                                  | H  | 0,5020  | 0,3445                                    | -2,7326 | H  | 3,5508  | -2,0289 | -1,5941 |
| C                                       | -0,3899 | 4,5258  | 1,6827                                   | C  | 4,1610  | 1,4981                                    | -2,1903 | H  | 3,4613  | -3,7921 | -1,4791 |
| H                                       | -0,4093 | 2,5172  | 2,4785                                   | H  | 4,0789  | 0,3914                                    | -0,3443 | H  | 0,4744  | -4,0875 | 2,0527  |
| H                                       | -0,3550 | 6,4067  | 0,6162                                   | H  | 3,9635  | 2,5265                                    | -4,0816 | H  | 2,2075  | -4,0539 | 2,4119  |
| H                                       | -0,4452 | 4,9902  | 2,6646                                   | H  | 5,1889  | 1,8153                                    | -2,0326 | H  | 1,5803  | -5,1635 | 1,1879  |
|                                         |         |         |                                          | C  | 0,6142  | 4,1383                                    | 0,0188  | C  | -1,3607 | 3,9174  | 0,8053  |
|                                         |         |         |                                          | C  | -0,2997 | 5,9991                                    | 1,2732  | C  | -1,3219 | 4,8540  | 3,0423  |
|                                         |         |         |                                          | C  | -0,8108 | 3,7307                                    | 1,9539  | C  | -0,0015 | 2,8861  | 2,5262  |
|                                         |         |         |                                          | C  | -0,9374 | 5,1046                                    | 2,1408  | C  | -0,4278 | 3,8540  | 3,4363  |
|                                         |         |         |                                          | H  | -1,5354 | 5,4809                                    | 2,9666  | H  | -0,0500 | 3,8320  | 4,4555  |
|                                         |         |         |                                          | H  | -1,2995 | 3,0283                                    | 2,6230  | H  | 0,7182  | 2,1283  | 2,8222  |
|                                         |         |         |                                          | C  | 0,4709  | 5,5102                                    | 0,2127  | C  | -1,7831 | 4,8803  | 1,7233  |
|                                         |         |         |                                          | H  | 1,2147  | 3,7478                                    | -0,7972 | H  | -1,7294 | 3,9392  | -0,2161 |
|                                         |         |         |                                          | H  | -0,4033 | 7,0700                                    | 1,4231  | H  | -1,6493 | 5,6077  | 3,7529  |
|                                         |         |         |                                          | H  | 0,9684  | 6,2013                                    | -0,4623 | H  | -2,4789 | 5,6518  | 1,4037  |
|                                         |         |         |                                          |    |         |                                           |         | C  | 3,6553  | -0,0889 | 1,3361  |
|                                         |         |         |                                          |    |         |                                           |         | C  | 4,2475  | 0,6516  | 3,5698  |
|                                         |         |         |                                          |    |         |                                           |         | C  | 2,0226  | -0,2018 | 3,1301  |
|                                         |         |         |                                          |    |         |                                           |         | C  | 2,9675  | 0,3153  | 4,0173  |
|                                         |         |         |                                          |    |         |                                           |         | H  | 2,6982  | 0,4576  | 5,0607  |
|                                         |         |         |                                          |    |         |                                           |         | H  | 1,0321  | -0,4799 | 3,4782  |
|                                         |         |         |                                          |    |         |                                           |         | C  | 4,5818  | 0,4508  | 2,2261  |
|                                         |         |         |                                          |    |         |                                           |         | H  | 3,9180  | -0,2458 | 0,2950  |
|                                         |         |         |                                          |    |         |                                           |         | H  | 4,9796  | 1,0604  | 4,2605  |
|                                         |         |         |                                          |    |         |                                           |         | H  | 5,5739  | 0,7118  | 1,8671  |



| 4-0             |         |         | 4-I              |    |         | 4-II             |         |    |         |         |         |
|-----------------|---------|---------|------------------|----|---------|------------------|---------|----|---------|---------|---------|
| E = -797.556845 |         |         | E = -1580.248622 |    |         | E = -2362.885112 |         |    |         |         |         |
| W               | -0,6559 | -0,7008 | -0,2095          | W  | 0,0136  | -0,0041          | 0,5212  | W  | -0,3567 | -0,1843 | -0,4401 |
| C               | -4,7612 | -3,0705 | -1,9168          | C  | -2,4756 | -0,8307          | 1,4851  | C  | -5,7294 | -1,5091 | -1,1985 |
| C               | -3,6327 | -2,6931 | -2,5240          | C  | -2,7340 | 0,0942           | 0,5322  | C  | -4,5916 | -1,1940 | -1,8242 |
| C               | -2,3125 | -2,4623 | -1,8356          | C  | -2,6569 | -0,1623          | -0,9549 | C  | -3,2093 | -1,4533 | -1,2825 |
| C               | -1,8229 | -0,9957 | -1,9712          | C  | -1,2432 | 0,3393           | -1,2862 | C  | -2,4302 | -0,1416 | -1,0532 |
| H               | -4,7975 | -3,2555 | -0,8442          | H  | -2,3779 | -1,8856          | 1,2427  | H  | -5,7274 | -1,9985 | -0,2255 |
| H               | -5,6869 | -3,2069 | -2,4705          | H  | -2,4715 | -0,5660          | 2,5380  | H  | -6,7009 | -1,2935 | -1,6370 |
| H               | -1,3715 | -1,0870 | 1,3351           | H  | -0,0845 | -0,9484          | 1,9725  | H  | -1,3432 | -0,6238 | 0,8434  |
| H               | -3,6338 | -2,5105 | -3,6000          | H  | -2,9000 | 1,1287           | 0,8346  | H  | -4,6359 | -0,7021 | -2,7980 |
| H               | -1,5434 | -3,1230 | -2,2540          | H  | -2,7412 | -1,2353          | -1,1541 | H  | -3,2809 | -2,0029 | -0,3371 |
| H               | -2,4282 | -2,7498 | -0,7734          | H  | -3,4506 | 0,3572           | -1,5044 | H  | -2,6563 | -2,0820 | -1,9916 |
| H               | -1,3539 | -0,8078 | -2,9412          | H  | -0,7885 | -0,1926          | -2,1276 | H  | -2,3517 | 0,4195  | -2,0052 |
| H               | -2,6649 | -0,2911 | -1,8593          | H  | -1,2316 | 1,4148           | -1,4925 | H  | -2,9774 | 0,4902  | -0,3454 |
| N               | -0,2037 | 1,0261  | -0,0944          | N  | 1,8044  | -0,1780          | -0,1066 | N  | -0,3748 | 1,3124  | 0,7670  |
| N               | 0,7650  | -1,7805 | -0,3366          | C  | 2,9249  | 0,6907           | -0,0328 | N  | 0,2790  | -1,8961 | 0,0026  |
| C               | 0,5556  | 2,1787  | -0,0252          | Al | 2,1144  | -1,9556          | -0,9009 | C  | -1,1179 | 1,6033  | 1,9369  |
| C               | 2,0829  | -2,1930 | -0,4037          | Cl | -0,0883 | -2,5335          | -0,4089 | C  | 0,4819  | -2,6731 | 1,1707  |
| C               | 2,6653  | -2,5085 | -1,6488          | C  | 2,2845  | -1,9440          | -2,8779 | Al | 1,0172  | 2,6429  | 0,3513  |
| C               | 4,7465  | -3,0779 | -0,5429          | C  | 3,3260  | -3,0348          | 0,2338  | Cl | 1,8337  | 1,0600  | -1,1745 |
| C               | 2,8496  | -2,3349 | 0,7717           | N  | -0,0152 | 1,5939           | 1,2786  | C  | 0,3934  | 4,1994  | -0,7004 |
| C               | 4,1705  | -2,7713 | 0,6945           | H  | 3,3005  | -1,6765          | -3,2005 | C  | 2,2963  | 2,7970  | 1,8514  |
| H               | 4,7532  | -2,8744 | 1,6064           | H  | 1,5883  | -1,2469          | -3,3624 | Al | 0,8444  | -2,8131 | -1,7099 |
| H               | 2,3956  | -2,0982 | 1,7298           | H  | 2,0760  | -2,9463          | -3,2786 | Cl | -0,1019 | -1,0437 | -2,9139 |
| C               | 3,9882  | -2,9416 | -1,7107          | H  | 3,0386  | -2,9987          | 1,2925  | C  | -0,2539 | -4,4238 | -2,0308 |
| H               | 2,0713  | -2,4024 | -2,5521          | H  | 4,3630  | -2,6774          | 0,1611  | C  | 2,8083  | -2,7835 | -1,8943 |
| H               | 5,7767  | -3,4189 | -0,5968          | H  | 3,3248  | -4,0888          | -0,0764 | H  | -0,0426 | 4,9791  | -0,0604 |
| H               | 4,4289  | -3,1780 | -2,6760          | C  | -0,0702 | 2,8208           | 1,9023  | H  | -0,3599 | 3,9289  | -1,4519 |
| C               | 1,1518  | 2,7175  | -1,1848          | C  | 3,3779  | 1,1747           | 1,2067  | H  | 1,2372  | 4,6600  | -1,2335 |
| C               | 2,0614  | 4,5489  | 0,1184           | C  | 5,1543  | 2,4005           | 0,1011  | H  | 2,5729  | 1,8183  | 2,2634  |
| C               | 0,7171  | 2,8479  | 1,2057           | C  | 3,6097  | 1,0623           | -1,2039 | H  | 1,8749  | 3,3944  | 2,6718  |
| C               | 1,4670  | 4,0209  | 1,2695           | C  | 4,7111  | 1,9165           | -1,1326 | H  | 3,2193  | 3,2962  | 1,5264  |
| H               | 1,5862  | 4,5272  | 2,2241           | H  | 5,2229  | 2,2043           | -2,0475 | H  | 3,2709  | -3,4860 | -1,1873 |
| H               | 0,2522  | 2,4343  | 2,0959           | H  | 3,2604  | 0,6976           | -2,1658 | H  | 3,2403  | -1,7926 | -1,7113 |
| C               | 1,9003  | 3,8900  | -1,1052          | C  | 4,4825  | 2,0235           | 1,2682  | H  | 3,1047  | -3,0966 | -2,9045 |
| H               | 1,0217  | 2,2036  | -2,1329          | H  | 2,8606  | 0,8717           | 2,1126  | H  | -1,3256 | -4,2606 | -1,8685 |
| H               | 2,6443  | 5,4641  | 0,1742           | H  | 6,0153  | 3,0612           | 0,1536  | H  | 0,0628  | -5,2493 | -1,3793 |
| H               | 2,3583  | 4,2930  | -2,0049          | H  | 4,8212  | 2,3891           | 2,2344  | H  | -0,1216 | -4,7591 | -3,0686 |
|                 |         |         |                  | C  | 0,0833  | 4,0027           | 1,1488  | C  | -1,8422 | 2,8082  | 2,0143  |
|                 |         |         |                  | C  | -0,1896 | 5,3181           | 3,1657  | C  | -2,5933 | 2,2330  | 4,2460  |
|                 |         |         |                  | C  | -0,2833 | 2,9002           | 3,2940  | C  | -1,1266 | 0,7275  | 3,0370  |
|                 |         |         |                  | C  | -0,3421 | 4,1457           | 3,9142  | C  | -1,8598 | 1,0437  | 4,1799  |
|                 |         |         |                  | H  | -0,5066 | 4,2022           | 4,9868  | H  | -1,8534 | 0,3602  | 5,0250  |
|                 |         |         |                  | H  | -0,3966 | 1,9838           | 3,8654  | H  | -0,5432 | -0,1872 | 2,9883  |
|                 |         |         |                  | C  | 0,0235  | 5,2401           | 1,7851  | C  | -2,5823 | 3,1102  | 3,1584  |
|                 |         |         |                  | H  | 0,2523  | 3,9321           | 0,0787  | H  | -1,8457 | 3,4859  | 1,1650  |
|                 |         |         |                  | H  | -0,2350 | 6,2866           | 3,6557  | H  | -3,1643 | 2,4744  | 5,1382  |
|                 |         |         |                  | H  | 0,1448  | 6,1483           | 1,2008  | H  | -3,1521 | 4,0349  | 3,1963  |
|                 |         |         |                  |    |         |                  |         | C  | 1,6138  | -2,4511 | 1,9732  |
|                 |         |         |                  |    |         |                  |         | C  | 0,8888  | -4,2075 | 3,4772  |
|                 |         |         |                  |    |         |                  |         | C  | -0,4385 | -3,6751 | 1,5201  |
|                 |         |         |                  |    |         |                  |         | C  | -0,2338 | -4,4301 | 2,6750  |
|                 |         |         |                  |    |         |                  |         | H  | -0,9553 | -5,1959 | 2,9465  |
|                 |         |         |                  |    |         |                  |         | H  | -1,3100 | -3,8427 | 0,8953  |
|                 |         |         |                  |    |         |                  |         | C  | 1,8098  | -3,2172 | 3,1216  |
|                 |         |         |                  |    |         |                  |         | H  | 2,3249  | -1,6798 | 1,6922  |
|                 |         |         |                  |    |         |                  |         | H  | 1,0448  | -4,8005 | 4,3740  |
|                 |         |         |                  |    |         |                  |         | H  | 2,6844  | -3,0369 | 3,7407  |

## S10

| TS <sub>RECH-0</sub> |         |         | TS <sub>RECH-I</sub> |    |         | TS <sub>RECH-II</sub> |         |    |         |         |         |
|----------------------|---------|---------|----------------------|----|---------|-----------------------|---------|----|---------|---------|---------|
| E = -797.459835      |         |         | E = -1580.165173     |    |         | E = -2362.848766      |         |    |         |         |         |
| W                    | -0,3240 | -0,5022 | 0,7881               | W  | -0,5499 | -0,2373               | 0,7326  | W  | -0,4685 | -0,2371 | -0,0856 |
| C                    | -5,7769 | -0,7710 | -1,4480              | C  | -5,1387 | -0,4463               | 2,0440  | C  | -6,1938 | -0,5882 | -1,7399 |
| C                    | -4,6080 | -1,4177 | -1,4169              | C  | -4,7341 | -0,3321               | 0,7755  | C  | -4,9500 | -1,0331 | -1,9389 |
| C                    | -3,7219 | -1,5300 | -0,2053              | C  | -3,9725 | -1,3834               | 0,0210  | C  | -3,9037 | -1,1595 | -0,8642 |
| C                    | -2,3635 | -0,8202 | -0,4633              | C  | -2,5501 | -0,9047               | -0,4083 | C  | -2,6924 | -0,2429 | -1,1630 |
| H                    | -6,1774 | -0,2743 | -0,5654              | H  | -4,9548 | -1,3507               | 2,6215  | H  | -6,5397 | -0,2829 | -0,7536 |
| H                    | -6,3765 | -0,7210 | -2,3536              | H  | -5,6726 | 0,3568                | 2,5460  | H  | -6,9101 | -0,5189 | -2,5549 |
| H                    | -1,9531 | -1,2345 | 0,8147               | H  | -2,2137 | -0,8352               | 0,9016  | H  | -2,1711 | -0,4674 | 0,0864  |
| H                    | -4,2407 | -1,9020 | -2,3235              | H  | -4,9388 | 0,5921                | 0,2314  | H  | -4,6390 | -1,3291 | -2,9421 |
| H                    | -3,5360 | -2,5892 | 0,0193               | H  | -3,8979 | -2,2997               | 0,6175  | H  | -4,3403 | -0,9118 | 0,1108  |
| H                    | -4,2172 | -1,0859 | 0,6654               | H  | -4,5023 | -1,6333               | -0,9092 | H  | -3,5543 | -2,1998 | -0,8149 |
| H                    | -1,8641 | -1,2672 | -1,3239              | H  | -2,0585 | -1,6942               | -0,9819 | H  | -2,2549 | -0,4996 | -2,1299 |
| H                    | -2,5285 | 0,2457  | -0,6231              | H  | -2,6372 | -0,0017               | -1,0125 | H  | -2,9750 | 0,8116  | -1,1569 |
| N                    | -0,2294 | 1,2974  | 0,8423               | N  | 0,8310  | -1,2535               | -0,1097 | N  | 0,0951  | -1,8181 | 0,7370  |
| N                    | 0,8971  | -1,3116 | -0,2632              | C  | 1,7973  | -1,0725               | -1,1278 | N  | -0,2713 | 1,1260  | 1,1649  |
| C                    | 0,0122  | 2,6340  | 0,6213               | Al | 1,1697  | -2,7713               | 1,1241  | C  | 0,0769  | -2,4906 | 1,9896  |
| C                    | 1,9023  | -1,5966 | -1,1608              | Cl | -0,3771 | -1,8733               | 2,7072  | C  | -0,3722 | 1,4005  | 2,5561  |
| C                    | 1,6011  | -2,0155 | -2,4761              | C  | 0,3813  | -4,5044               | 0,5790  | Al | 0,9502  | -3,0063 | -0,6709 |
| C                    | 3,9659  | -2,2243 | -2,9767              | C  | 2,9699  | -2,5934               | 1,9214  | Cl | 0,1672  | -1,5919 | -2,3185 |
| C                    | 3,2574  | -1,4992 | -0,7732              | N  | -0,5368 | 1,5093                | 0,3671  | C  | 2,9257  | -2,9213 | -0,6596 |
| C                    | 4,2722  | -1,8149 | -1,6743              | H  | 0,9940  | -5,0065               | -0,1829 | C  | -0,0836 | -4,6896 | -0,7464 |
| H                    | 5,3098  | -1,7359 | -1,3590              | H  | -0,6305 | -4,3951               | 0,1671  | Al | 0,2198  | 2,8257  | 0,1410  |
| H                    | 3,4900  | -1,1728 | 0,2364               | H  | 0,3153  | -5,1867               | 1,4377  | Cl | -0,2621 | 1,7612  | -1,8508 |
| C                    | 2,6259  | -2,3177 | -3,3702              | H  | 3,1593  | -1,5742               | 2,2804  | C  | -1,1851 | 4,1635  | 0,5166  |
| H                    | 0,5611  | -2,0926 | -2,7807              | H  | 3,7535  | -2,8391               | 1,1918  | C  | 2,1583  | 3,2092  | 0,1950  |
| H                    | 4,7608  | -2,4646 | -3,6774              | H  | 3,0881  | -3,2778               | 2,7723  | H  | 2,7669  | 2,3089  | 0,0425  |
| H                    | 2,3771  | -2,6336 | -4,3804              | C  | -0,6887 | 2,8786                | 0,2842  | H  | 2,4651  | 3,6650  | 1,1457  |
| C                    | -0,5563 | 3,3021  | -0,4868              | C  | 2,4338  | 0,1674                | -1,3201 | H  | 2,4159  | 3,9208  | -0,6015 |
| C                    | 0,4749  | 5,3863  | 0,2081               | C  | 3,7207  | -0,7546               | -3,1576 | H  | -1,0846 | 4,5701  | 1,5320  |
| C                    | 0,8214  | 3,3711  | 1,5151               | C  | 2,1403  | -2,1508               | -1,9650 | H  | -2,1962 | 3,7473  | 0,4241  |
| C                    | 1,0426  | 4,7310  | 1,3065               | C  | 3,0941  | -1,9889               | -2,9714 | H  | -1,1069 | 5,0068  | -0,1827 |
| H                    | 1,6675  | 5,2824  | 2,0049               | H  | 3,3443  | -2,8310               | -3,6114 | H  | 3,3644  | -3,5607 | 0,1179  |
| H                    | 1,2671  | 2,8588  | 2,3632               | H  | 1,6417  | -3,1081               | -1,8345 | H  | 3,2988  | -1,9009 | -0,5049 |
| C                    | -0,3216 | 4,6610  | -0,6855              | C  | 3,3835  | 0,3210                | -2,3276 | H  | 3,3169  | -3,2727 | -1,6245 |
| H                    | -1,1709 | 2,7390  | -1,1834              | H  | 2,1714  | 0,9987                | -0,6716 | H  | -1,1660 | -4,5113 | -0,7691 |
| H                    | 0,6548  | 6,4457  | 0,0475               | H  | 4,4639  | -0,6298               | -3,9402 | H  | 0,1299  | -5,3305 | 0,1193  |
| H                    | -0,7645 | 5,1581  | -1,5453              | H  | 3,8666  | 1,2853                | -2,4639 | H  | 0,1779  | -5,2595 | -1,6483 |
|                      |         |         |                      | C  | -1,1044 | 3,4705                | -0,9275 | C  | -1,6196 | 1,3182  | 3,1958  |
|                      |         |         |                      | C  | -0,9842 | 5,6688                | 0,0899  | C  | -0,5835 | 1,9457  | 5,2960  |
|                      |         |         |                      | C  | -0,4155 | 3,7053                | 1,3949  | C  | 0,7674  | 1,7628  | 3,2914  |
|                      |         |         |                      | C  | -0,5647 | 5,0865                | 1,2914  | C  | 0,6558  | 2,0250  | 4,6581  |
|                      |         |         |                      | H  | -0,3505 | 5,7131                | 2,1535  | H  | 1,5452  | 2,2915  | 5,2229  |
|                      |         |         |                      | H  | -0,0851 | 3,2485                | 2,3236  | H  | 1,7332  | 1,8116  | 2,7974  |
|                      |         |         |                      | C  | -1,2531 | 4,8535                | -1,0148 | C  | -1,7182 | 1,5927  | 4,5579  |
|                      |         |         |                      | H  | -1,3025 | 2,8338                | -1,7848 | H  | -2,4960 | 1,0400  | 2,6183  |
|                      |         |         |                      | H  | -1,0966 | 6,7468                | 0,0144  | H  | -0,6660 | 2,1534  | 6,3592  |
|                      |         |         |                      | H  | -1,5752 | 5,2977                | -1,9533 | H  | -2,6872 | 1,5262  | 5,0462  |
|                      |         |         |                      |    |         |                       |         | C  | 1,2815  | -2,7960 | 2,6437  |
|                      |         |         |                      |    |         |                       |         | C  | 0,0421  | -3,8392 | 4,4475  |
|                      |         |         |                      |    |         |                       |         | C  | -1,1454 | -2,8653 | 2,5710  |
|                      |         |         |                      |    |         |                       |         | C  | -1,1560 | -3,5383 | 3,7906  |
|                      |         |         |                      |    |         |                       |         | H  | -2,1068 | -3,8257 | 4,2321  |
|                      |         |         |                      |    |         |                       |         | H  | -2,0725 | -2,6255 | 2,0593  |
|                      |         |         |                      |    |         |                       |         | C  | 1,2563  | -3,4610 | 3,8711  |
|                      |         |         |                      |    |         |                       |         | H  | 2,2252  | -2,4903 | 2,2020  |
|                      |         |         |                      |    |         |                       |         | H  | 0,0271  | -4,3601 | 5,4007  |
|                      |         |         |                      |    |         |                       |         | H  | 2,1933  | -3,6818 | 4,3755  |

## S11

| TS <sub>INS-0</sub> |         |         | TS <sub>INS-I</sub> |    |         | TS <sub>INS-II</sub> |         |    |         |         |         |
|---------------------|---------|---------|---------------------|----|---------|----------------------|---------|----|---------|---------|---------|
| E = -876.194767     |         |         | E = -1658.876729    |    |         | E = -2441.510822     |         |    |         |         |         |
| W                   | -0,1254 | -0,4956 | 0,5883              | W  | -0,9018 | -0,2066              | 0,0495  | W  | -0,7496 | -0,5782 | 0,1203  |
| C                   | -2,3866 | -0,7914 | 1,6948              | C  | -3,1099 | -0,3516              | 1,4824  | C  | -3,1008 | -0,8548 | 1,0637  |
| C                   | -3,2273 | 0,4378  | 1,3748              | C  | -3,8411 | 0,8479               | 0,8864  | C  | -3,8538 | -1,7979 | 0,1482  |
| C                   | -3,0110 | 0,7904  | -0,0910             | C  | -3,7748 | 0,8529               | -0,6550 | C  | -3,5085 | -1,5268 | -1,3288 |
| C                   | -1,5142 | 0,9762  | -0,3025             | C  | -2,7681 | -0,1928              | -1,1369 | C  | -2,3098 | -0,5804 | -1,4362 |
| N                   | 1,2820  | 0,4773  | 0,0248              | H  | -3,3868 | -1,3031              | 1,0238  | H  | -3,2297 | 0,1966  | 0,7875  |
| C                   | 2,3433  | 1,2309  | -0,4092             | H  | -3,3530 | -0,4151              | 2,5414  | H  | -3,4321 | -0,9583 | 2,0948  |
| H                   | -2,4643 | -1,5470 | 0,8995              | H  | -4,8847 | 0,8110               | 1,2382  | H  | -4,9318 | -1,6709 | 0,3367  |
| H                   | -2,7281 | -1,2664 | 2,6117              | H  | -3,4264 | 1,7797               | 1,2899  | H  | -3,6239 | -2,8374 | 0,4088  |
| H                   | -4,2858 | 0,2261  | 1,5940              | H  | -4,7699 | 0,6485               | -1,0753 | H  | -4,3671 | -1,0783 | -1,8460 |
| H                   | -2,9417 | 1,2883  | 2,0118              | H  | -3,4769 | 1,8428               | -1,0179 | H  | -3,2849 | -2,4650 | -1,8443 |
| H                   | -3,3856 | -0,0337 | -0,7147             | H  | -3,1919 | -1,2032              | -1,1263 | H  | -2,6335 | 0,4685  | -1,3669 |
| H                   | -3,5736 | 1,6920  | -0,3758             | H  | -2,4307 | 0,0186               | -2,1605 | H  | -1,7841 | -0,6811 | -2,3901 |
| C                   | -0,5899 | -0,9429 | 3,0775              | C  | -1,1943 | -0,5466              | 2,6038  | C  | -1,3065 | -1,5670 | 2,4085  |
| H                   | -1,1882 | 1,9113  | 0,1850              | C  | 0,0974  | -0,6118              | 2,0152  | C  | 0,0465  | -1,5239 | 2,0181  |
| N                   | -0,2072 | -2,0455 | -0,3323             | N  | -0,6626 | 1,5427               | 0,0360  | H  | 0,5520  | -2,4439 | 1,7452  |
| H                   | -1,2459 | 1,0670  | -1,3632             | C  | -0,4662 | 2,9080               | 0,0371  | H  | 0,6773  | -0,7396 | 2,4350  |
| C                   | 0,7489  | -0,8612 | 2,6271              | H  | 0,7767  | 0,2245               | 2,1675  | H  | -1,8500 | -2,5034 | 2,3857  |
| H                   | 1,3216  | 0,0358  | 2,8546              | H  | 0,5678  | -1,5897              | 1,9417  | H  | -1,6737 | -0,8109 | 3,0927  |
| H                   | 1,3281  | -1,7801 | 2,5583              | H  | -1,4718 | 0,3442               | 3,1568  | N  | -0,6603 | 1,1136  | 0,8357  |
| H                   | -1,0323 | -0,1159 | 3,6227              | H  | -1,6462 | -1,4686              | 2,9490  | C  | -0,5744 | 1,7837  | 2,0878  |
| H                   | -0,9914 | -1,9210 | 3,3130              | C  | 0,0690  | 3,5453               | -1,1010 | Al | -0,9560 | 2,8163  | -0,5502 |
| C                   | 3,2742  | 0,7039  | -1,3342             | C  | -0,0642 | 5,6817               | 0,0371  | Cl | -0,5277 | 2,0771  | -2,5877 |
| C                   | 4,5115  | 2,7882  | -1,3113             | C  | -0,7990 | 3,6720               | 1,1742  | C  | 0,4744  | 4,0746  | -0,0086 |
| C                   | 2,5238  | 2,5541  | 0,0546              | C  | -0,5947 | 5,0502               | 1,1667  | C  | -2,8834 | 3,2505  | -0,3546 |
| C                   | 3,5962  | 3,3205  | -0,3968             | C  | 0,2649  | 4,9242               | -1,0921 | H  | 0,2965  | 4,5408  | 0,9681  |
| C                   | 4,3449  | 1,4777  | -1,7747             | H  | 0,3250  | 2,9498               | -1,9713 | H  | 1,4634  | 3,6002  | 0,0173  |
| C                   | 0,2181  | -2,9305 | -1,3023             | H  | 0,0922  | 6,7566               | 0,0368  | H  | 0,5201  | 4,8773  | -0,7592 |
| C                   | 0,3003  | -4,3098 | -1,0101             | H  | -1,2110 | 3,1761               | 2,0476  | H  | -3,1760 | 3,8743  | -1,2117 |
| C                   | 1,0267  | -4,7745 | -3,2784             | H  | -0,8526 | 5,6336               | 2,0465  | H  | -3,5570 | 2,3837  | -0,3509 |
| C                   | 0,5413  | -2,4939 | -2,6063             | H  | 0,6782  | 5,4102               | -1,9719 | H  | -3,0843 | 3,8315  | 0,5546  |
| C                   | 0,9416  | -3,4097 | -3,5773             | N  | 0,3120  | -0,8441              | -1,2944 | C  | 0,6734  | 2,0199  | 2,6890  |
| H                   | 1,1868  | -3,0558 | -4,5758             | C  | 1,2233  | -0,1292              | -2,1199 | C  | -0,4326 | 3,0303  | 4,5941  |
| H                   | 0,4737  | -1,4342 | -2,8362             | Al | 0,2953  | -2,7881              | -1,5145 | C  | -1,7505 | 2,1879  | 2,7431  |
| C                   | 0,7063  | -5,2151 | -1,9896             | Cl | -1,2859 | -2,9267              | 0,1756  | C  | -1,6730 | 2,8032  | 3,9924  |
| H                   | 0,0473  | -4,6504 | -0,0099             | C  | -0,5470 | -3,3895              | -3,2073 | H  | -2,5882 | 3,1047  | 4,4947  |
| H                   | 1,3388  | -5,4845 | -4,0394             | C  | 1,9922  | -3,5935              | -0,8774 | H  | -2,7133 | 2,0107  | 2,2763  |
| H                   | 0,7677  | -6,2730 | -1,7460             | H  | 0,1305  | -3,2665              | -4,0638 | C  | 0,7368  | 2,6363  | 3,9376  |
| H                   | 3,1375  | -0,3126 | -1,6916             | H  | -1,4718 | -2,8434              | -3,4359 | H  | 1,5822  | 1,7326  | 2,1718  |
| H                   | 5,3473  | 3,3886  | -1,6603             | H  | -0,8027 | -4,4572              | -3,1506 | H  | -0,3772 | 3,5123  | 5,5661  |
| H                   | 1,8100  | 2,9615  | 0,7653              | H  | 1,9015  | -4,6845              | -0,7802 | H  | 1,7062  | 2,8124  | 4,3955  |
| H                   | 3,7205  | 4,3376  | -0,0333             | H  | 2,3021  | -3,2000              | 0,0995  | N  | 0,7840  | -0,9341 | -0,9783 |
| H                   | 5,0533  | 1,0588  | -2,4851             | H  | 2,8120  | -3,3998              | -1,5836 | C  | 1,9407  | -0,1976 | -1,3407 |
|                     |         |         |                     | C  | 0,9686  | 0,0204               | -3,4948 | Al | 0,8895  | -2,8088 | -1,5907 |
|                     |         |         |                     | C  | 3,0366  | 1,2611               | -3,7636 | Cl | -1,0091 | -3,2431 | -0,3376 |
|                     |         |         |                     | C  | 2,4030  | 0,4125               | -1,5814 | C  | 2,4328  | -3,7114 | -0,7362 |
|                     |         |         |                     | C  | 3,2993  | 1,1007               | -2,3999 | C  | 0,4289  | -3,1100 | -3,4954 |
|                     |         |         |                     | H  | 4,2070  | 1,5142               | -1,9673 | H  | 3,3767  | -3,4201 | -1,2178 |
|                     |         |         |                     | H  | 2,6060  | 0,2875               | -0,5214 | H  | 2,5272  | -3,4801 | 0,3327  |
|                     |         |         |                     | C  | 1,8667  | 0,7194               | -4,3036 | H  | 2,3436  | -4,8025 | -0,8315 |
|                     |         |         |                     | H  | 0,0600  | -0,3980              | -3,9178 | H  | 0,0355  | -4,1291 | -3,6179 |
|                     |         |         |                     | H  | 3,7354  | 1,7997               | -4,3978 | H  | -0,3366 | -2,4188 | -3,8704 |
|                     |         |         |                     | H  | 1,6489  | 0,8373               | -5,3623 | H  | 1,3064  | -3,0230 | -4,1500 |
|                     |         |         |                     |    |         |                      |         | C  | 2,7331  | 0,4357  | -0,3691 |
|                     |         |         |                     |    |         |                      |         | C  | 4,2808  | 1,1767  | -2,0795 |
|                     |         |         |                     |    |         |                      |         | C  | 2,3423  | -0,1441 | -2,6888 |
|                     |         |         |                     |    |         |                      |         | C  | 3,4966  | 0,5480  | -3,0502 |
|                     |         |         |                     |    |         |                      |         | H  | 3,7833  | 0,5944  | -4,0976 |
|                     |         |         |                     |    |         |                      |         | H  | 1,7264  | -0,6136 | -3,4497 |
|                     |         |         |                     |    |         |                      |         | C  | 3,8948  | 1,1119  | -0,7378 |
|                     |         |         |                     |    |         |                      |         | H  | 2,4448  | 0,3643  | 0,6746  |
|                     |         |         |                     |    |         |                      |         | H  | 5,1843  | 1,7086  | -2,3643 |
|                     |         |         |                     |    |         |                      |         | H  | 4,5017  | 1,5883  | 0,0279  |
